# Supplementary material for: Enabling quantitative analysis of complex polymer blends by infrared nanospectroscopy and isotopic deuteration
Source: Royal Society of Chemistry journal article supplement (doi:10.1039/d3nr00886j), 2023-01-01
Supplement: d3nr00886j1.pdf [file d3nr00886j1.pdf]

SUPPORTING INFORMATION

# *Enabling Quantitative Analysis of Complex Polymer Blends by Infrared Nanospectroscopy and Isotopic Deuteration*

*Nathaniel Prine<sup>a</sup>, Zhiqiang Cao<sup>a</sup>, Tianyu Li<sup>b,c</sup>, Changwoo Do<sup>f</sup>, Kunlun Hong<sup>b,d</sup>, Camille Cardinal<sup>a</sup>, Travis L. Thornell<sup>e</sup>, Sarah E. Morgan<sup>a</sup>, Xiaodan Gu<sup>\*a</sup>*

*<sup>a</sup>School of Polymer Science and Engineering, The University of Southern Mississippi, Hattiesburg, MS 39406, United States*

*<sup>b</sup>Center for Nanophase Materials Sciences, Oak Ridge National Laboratory, Oak Ridge, Tennessee 37831, United States*

*<sup>c</sup>Department of Materials Science and Engineering, University of Tennessee, Knoxville, Tennessee 37996, United States*

*<sup>d</sup>Department of Chemical & Biomolecular Engineering, University of Tennessee, Knoxville, Tennessee 37996, United States*

*<sup>e</sup>U.S. Army Engineer Research and Development Center, Vicksburg, Mississippi 39180, United States*

SUPPORTING INFORMATION

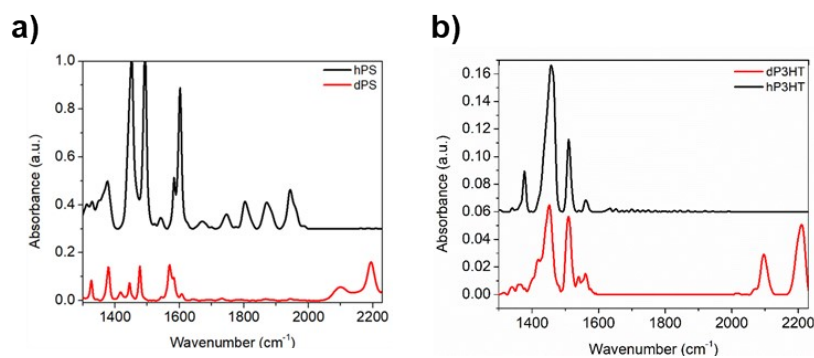

**Figure S1.** Bulk FTIR spectra of individual blend components. Deuterated and non-deuterated (a) Polystyrene and (b) P3HT. The data corresponding to hPS and hP3HT have been shifted virtually for clarity.

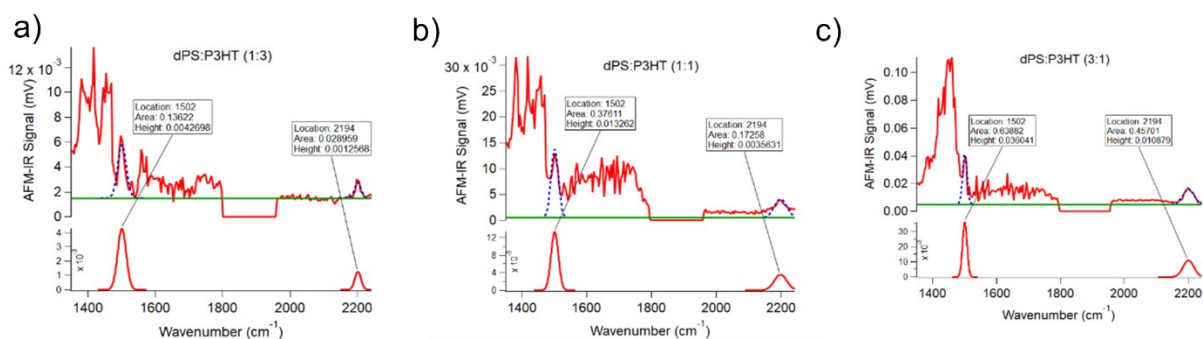

**Figure S2.** AFM-IR spectra and curve fitting for samples composed of dPS:P3HT prepared at a (a) 1:3, (b) 1:1, and (c) 3:1 ratio.

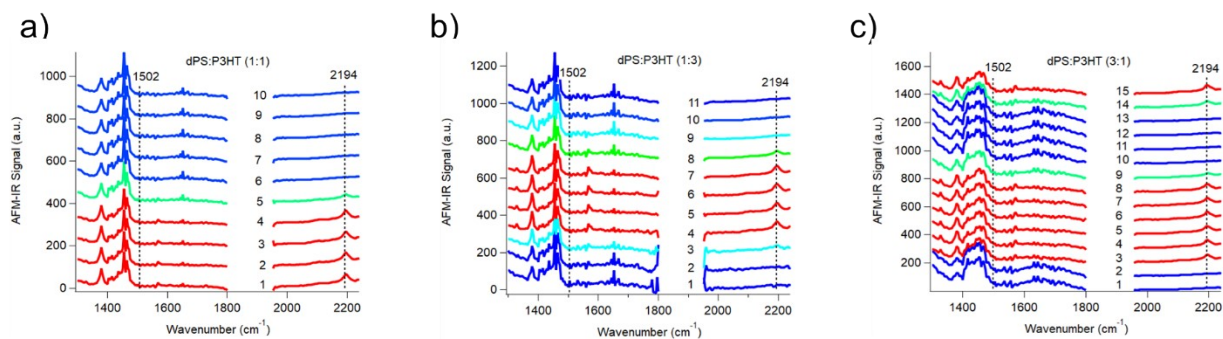

**Figure S3.** AFM-IR spectra line scans of dPS:P3HT blends prepared with a) 1:3, b) 1:1, and c) 3:1 Ratio.

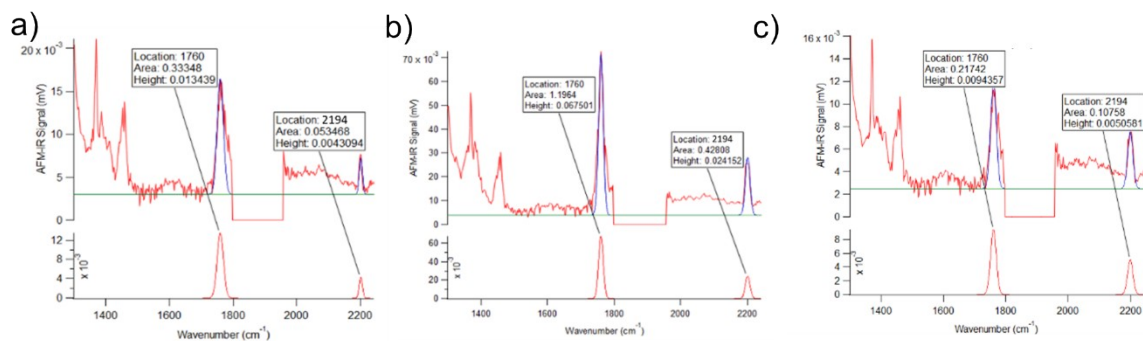

**Figure S4.** AFM-IR spectra and curve fitting for samples composed of dPS:PLA prepared at a

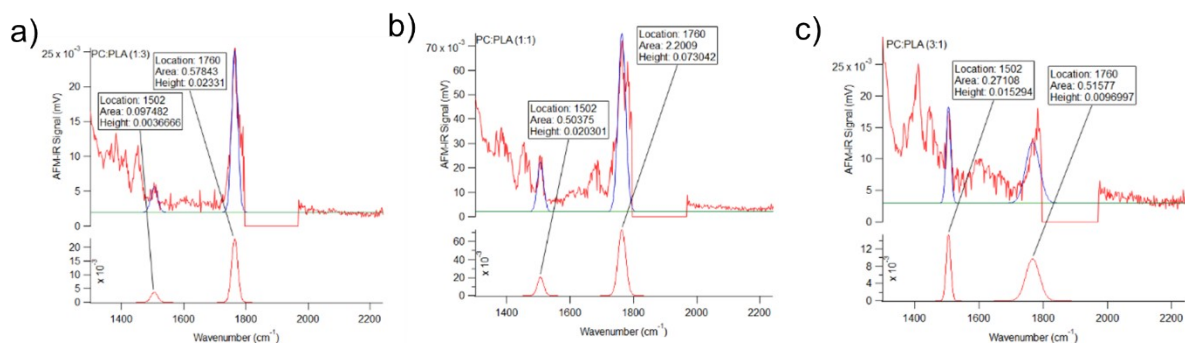

(a) 1:3, (b) 1:1, and (c) 3:1 ratio.

**Figure S5.** AFM-IR spectra and curve fitting for samples composed of PC:PLA prepared at a (a) 1:3, (b) 1:1, and (c) 3:1 ratio.

**Figure S6.** Calibration curves generated from Figures S4 and S5 for (a) dPS:PLA and (b) PC:PLA blends prepared at a 1:3, 1:1, and 3:1 ratio.

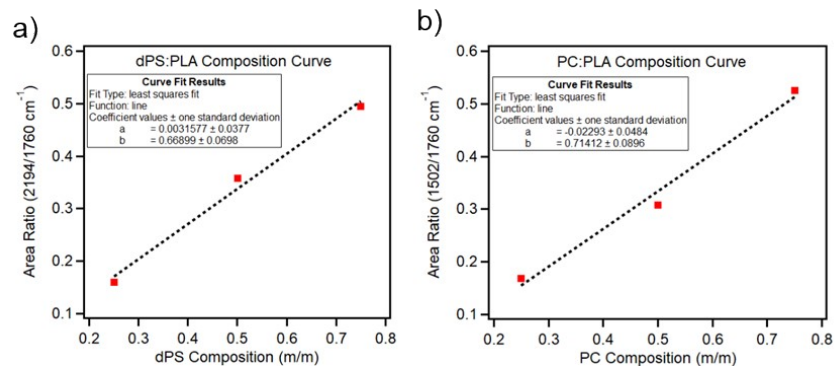

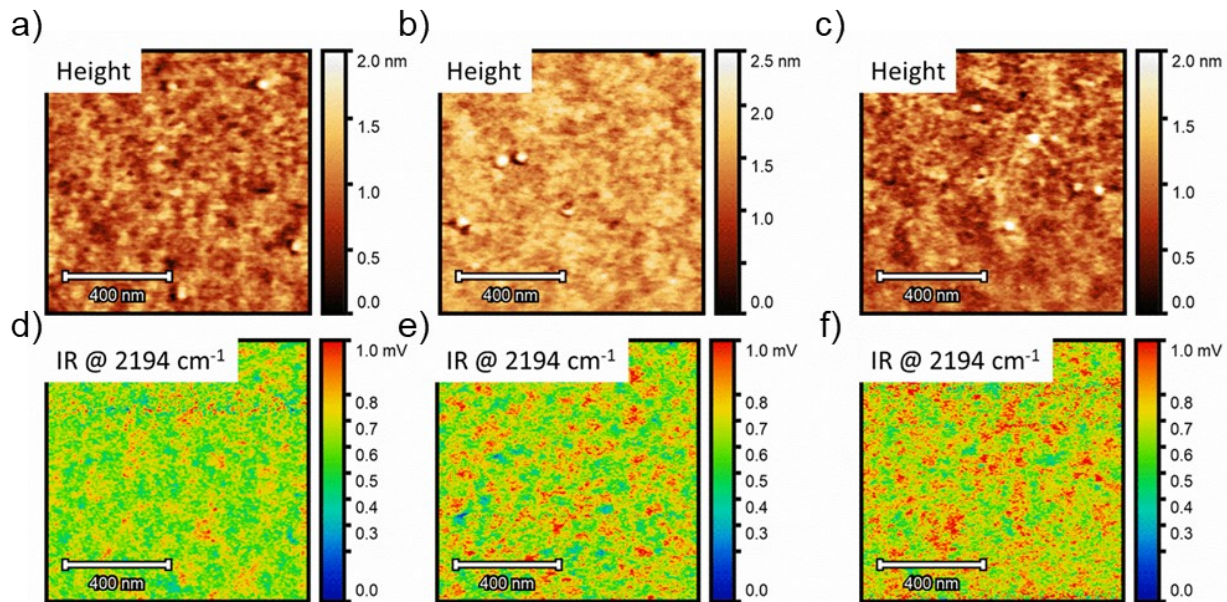

**Figure S7.** Height images of dPS:hPS blends prepared at (a) 1:3 ratio, (b) 1:1 ratio, and (c) 3:1 ratio. Single-band AFM-IR images obtained at a resonance wavelength of dPS, corresponding to dPS:hPS blends prepared at (d) 1:3 ratio, (e) 1:1 ratio, and (f) 3:1 ratio.

**Table T1.** Peak area ratio and composition values for blend of dPS:PLA:PC

| Point | PC/PLA Area Ratio | dPS/PLA Area Ratio | % PC | % dPS | % PLA |
|-------|-------------------|--------------------|------|-------|-------|
| 1     | 0.391             | 0.447              | 0    | 100   | 0     |
| 2     | 0.179             | 0.0209             | 28.2 | 2.65  | 69.1  |
| 3     | 0.258             | 0.153              | 39.4 | 22.4  | 38.3  |

**Table  
RMS**

| Sample             | RMS Roughness (nm) |
|--------------------|--------------------|
| dPS:P3HT (1:1)     | 6.023              |
| dPS:PLA:PC (1:1:1) | 15.95              |
| dPS:hPS (1:1)      | 0.281              |

**T2.**

Roughness values for films measured in this study
